# Supplementary material for: Phosphorus stimulated unidirectional growth of TiO2 nanostructures
Source: Royal Society of Chemistry journal article supplement (doi:10.1039/c3ta01403g), 2013-01-01
Supplement: c3ta01403g.pdf [file c3ta01403g.pdf]

## Supplementary Information for

### **Phosphorus stimulated unidirectional growth of TiO<sub>2</sub> nanostructures**

Lauren M. White<sup>1</sup>, Myung Hwa Kim<sup>2</sup>, Jinping Zhang<sup>3</sup>, Stephan Kraemer<sup>4</sup>, Cafer T. Yavuz<sup>5</sup>,  
Martin Moskovits<sup>1</sup>, and Alec M. Wodtke<sup>1,6,7</sup>, Galen D. Stucky<sup>\*1,4</sup>

<sup>1</sup> *Department of Chemistry & Biochemistry, University of California at Santa Barbara, Santa Barbara, 93106, USA*

<sup>2</sup> *Department of Chemistry & Nano Science, Ewha Womans University, Seoul 120-750, Korea*

<sup>3</sup> *Suzhou Institute of Nano-Tech & Nano-Bionics, Chinese Academy of Sciences, Suzhou 215125, China*

<sup>4</sup> *Materials Department, University of California at Santa Barbara*

<sup>5</sup> *Graduate School of EEWS, KAIST, Daejeon, 305-701, Republic of Korea*

<sup>6</sup> *Institute of Physical Chemistry, Georg-August University of Göttingen, Germany*

<sup>7</sup> *Department of Dynamics at Surfaces, Max-Planck Institute for Biophysical Chemistry, Göttingen, Germany*

\* To whom all correspondence should be addressed: [stucky@chem.ucsb.edu](mailto:stucky@chem.ucsb.edu)

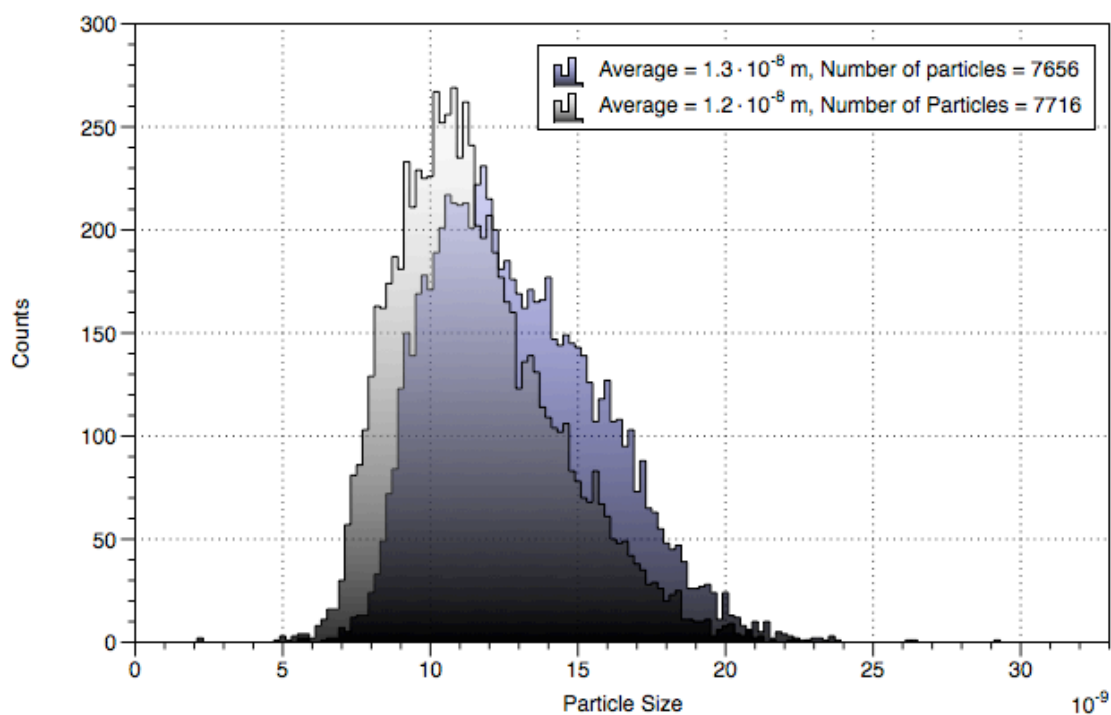

**Figure S1:** Atomic Force Microscopy histogram showing the average particle sizes for synthesized  $\text{Ni}_x\text{P}_y$  nanoparticles range from 10-12nm.

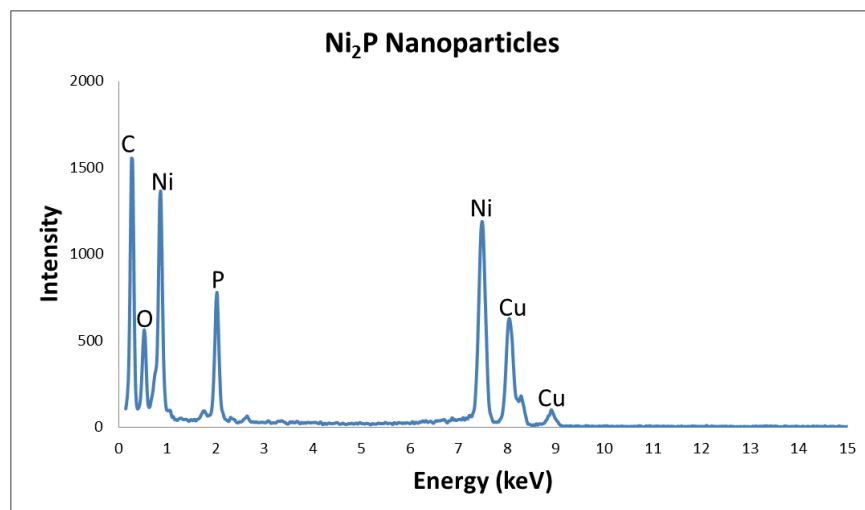

**Figure S2:** EDS spectra collected from synthesized  $\text{Ni}_x\text{P}_y$  nanoparticles.<sup>15</sup> Spectra show nanoparticle compositions are Ni and P. The carbon and oxygen peaks are attributed to the surfactant surrounding the nanoparticles while copper peaks are attributed to the copper grid upon which the particles were dispersed.

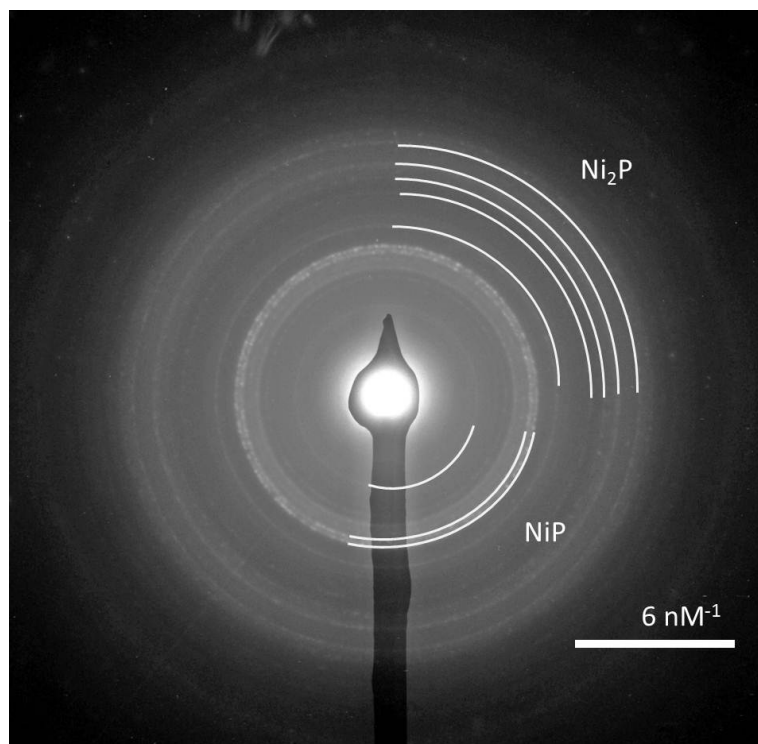

**Figure S3:** SAED pattern of starting  $\text{Ni}_x\text{P}_y$  nanoparticles. Measured ring diameters fall closely on those reported for  $\text{Ni}_2\text{P}$ <sup>16</sup> and  $\text{NiP}$ <sup>17</sup>.

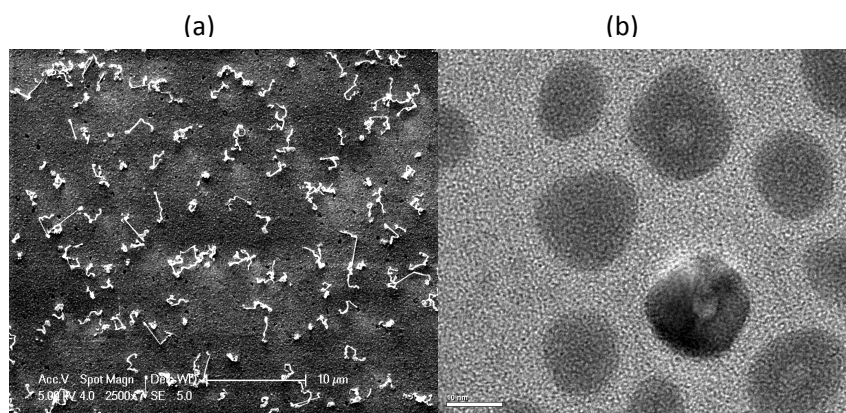

**Figure S4:** (a) SEM image showing bent nanowires grown from  $\text{Ni}_x\text{P}_y$  seed catalysts. (b) HRTEM image shows catalyst particles used for nanowire growth are actually a mixture of crystalline hollow and solid  $\text{Ni}_x\text{P}_y$  NPs.

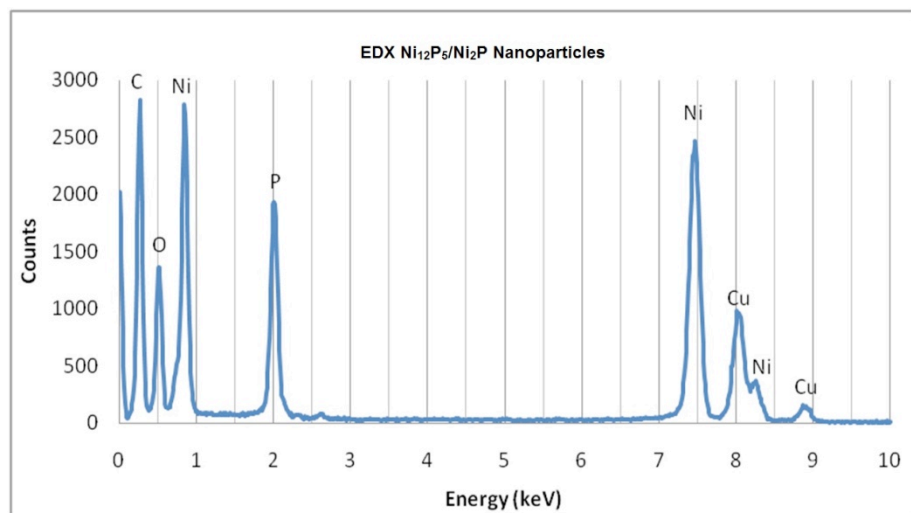

**Figure S5:** EDX spectrum collected under TEM analysis of starting  $\text{Ni}_{12}\text{P}_5/\text{Ni}_2\text{P}$  nanoparticles to be used for phosphorus-assisted nanowire growth.



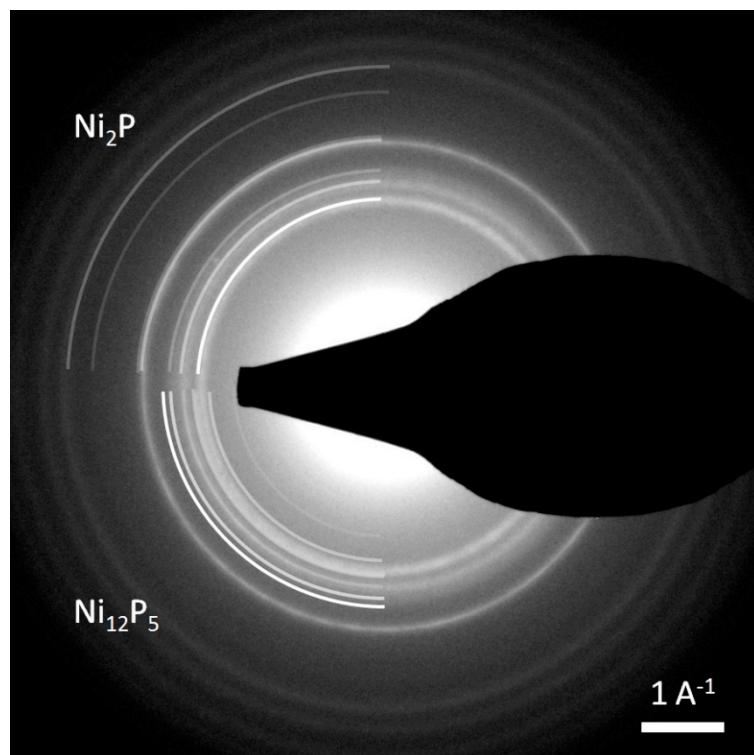

**Figure S6:** SAED pattern of starting  $\text{Ni}_{12}\text{P}_5/\text{Ni}_2\text{P}$  nanoparticles. Measured ring diameters fall closely on those reported for  $\text{Ni}_2\text{P}$ . Broadening of some rings may be due to trace amounts of  $\text{Ni}_{12}\text{P}_5$  but the majority of the composition is assumed to be  $\text{Ni}_2\text{P}$ .

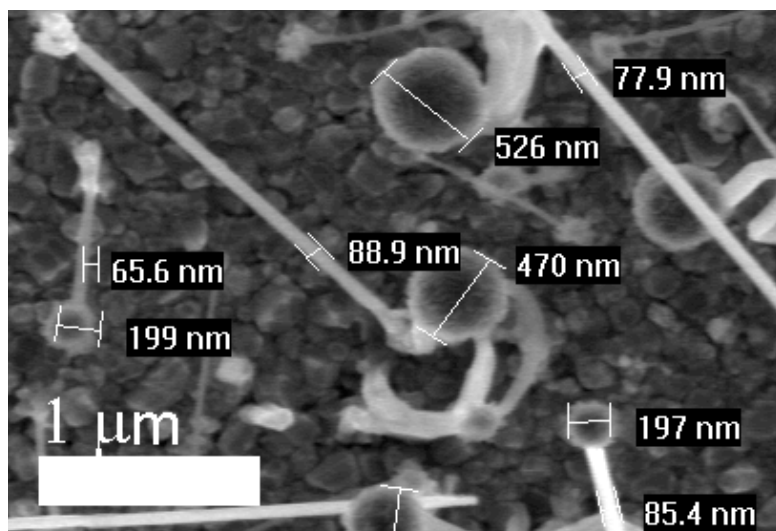

**Figure S7:** SEM image of nanowires grown from  $\text{Ni}_2\text{P}$  seeds. Seed particle diameters appear different (197nm and 470nm) while nanowire diameters remain closely similar (85.4nm and 88.9nm).

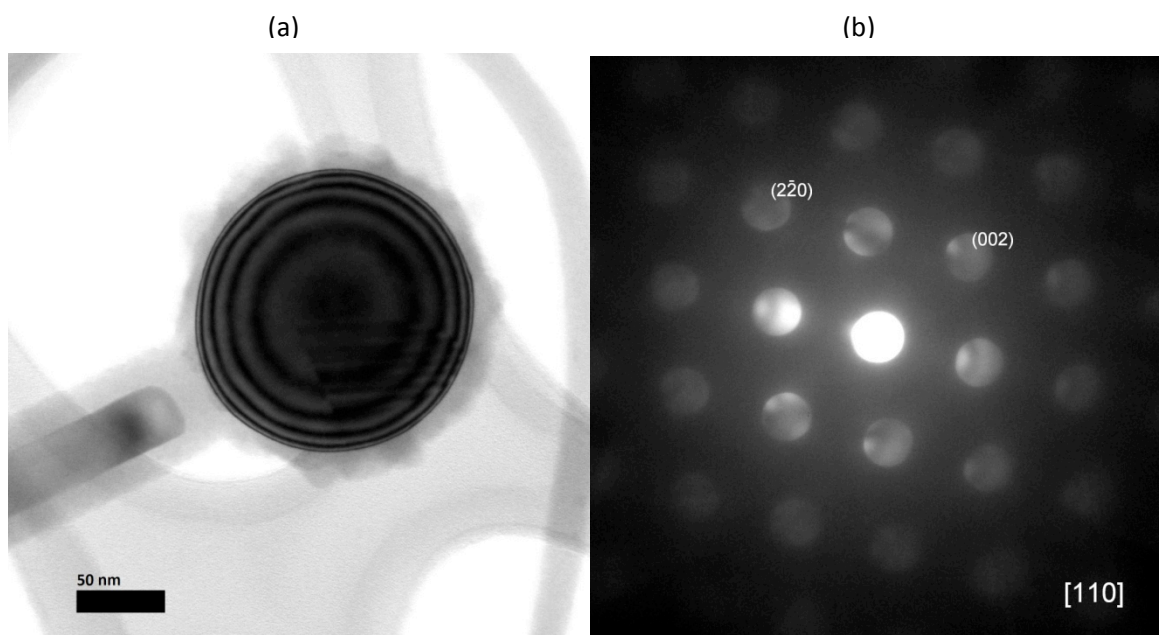

**Figure S8:** (a) BF TEM image of nanowire fabricated from  $\text{Ni}_2\text{P}$  nanoparticles. (b) CBED pattern of seed particle indicates a Ni composition.

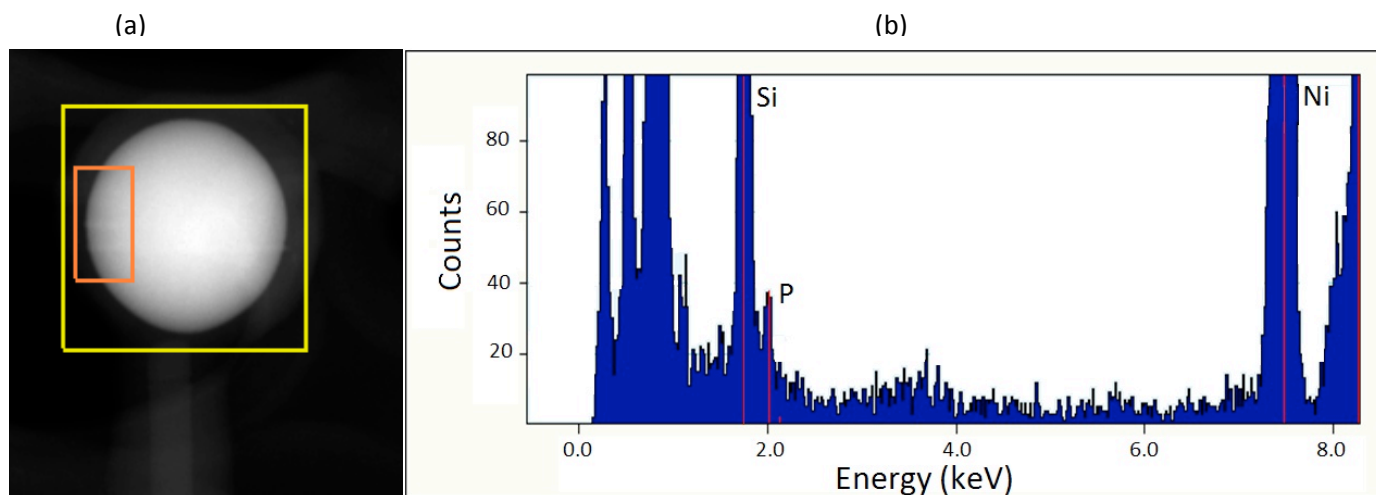

**Figure S9:** (a) STEM HAADF image of the nanowire and catalyst particle shown in Fig S5. (b) EDX analysis of catalyst particle shown in Fig S5. Line scans show that while SAED patterns indicate the catalyst particle is composed of Ni, a thin shell of P is still present on the exterior of the nanoparticle.
